# Supplementary material
Source: PubMed Central journal article supplement (PMC4108942)
Supplement: Supp_Figure1.pdf [file Supp_Figure1.pdf]

## Supplementary Data

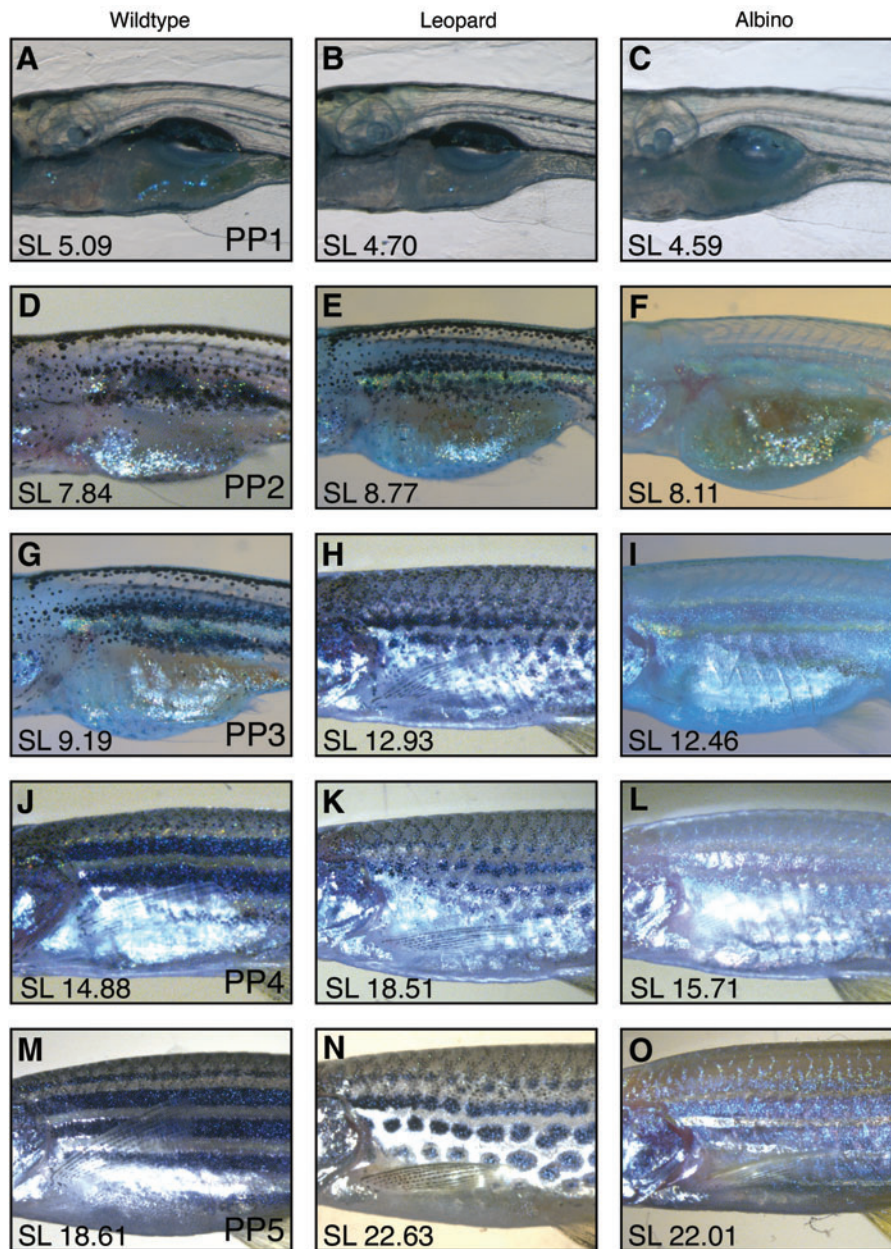

**SUPPLEMENTARY FIG. S1.** Pigment differences vary by stage as well as between fish of differing genotypes. Leopard mutants (*cx41.8<sup>sl</sup>*) and albino mutant fish (*slc45a2<sup>b4</sup>*) were stage matched by standard length (SL) to appropriate wildtype fish. Wildtype fish PP1–5 (**A**, **D**, **G**, **J**, **M**), leopard pigmented fish (**B**, **E**, **H**, **K**, **N**), and albino fish (**C**, **F**, **I**, **L**, **O**) show different development of pigment pattern.
