# Supplementary material
Source: PubMed Central journal article supplement (PMC4108942)
Supplement: Supp_Figure4.pdf [file Supp_Figure4.pdf]

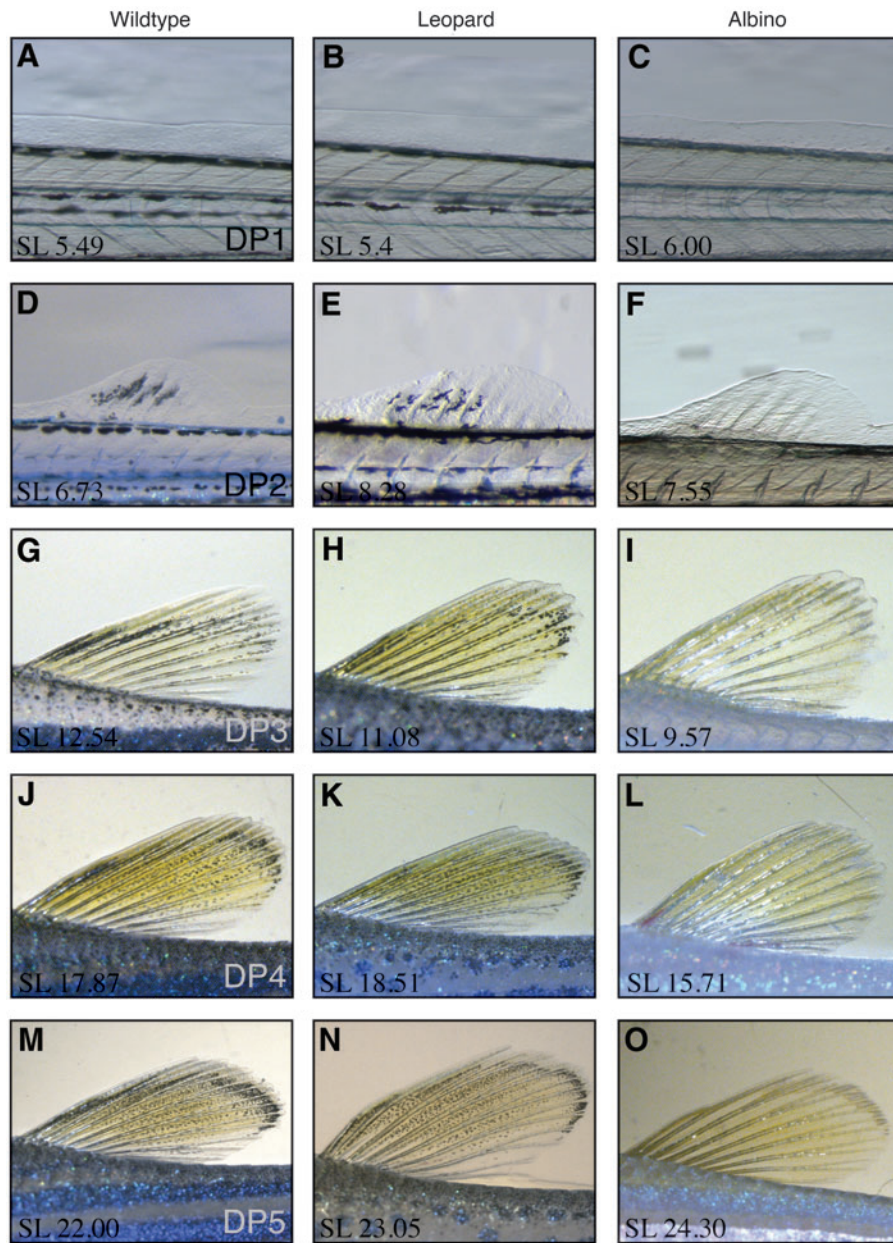

**SUPPLEMENTARY FIG. S4.** The dorsal fin morphology is consistent through phenotype stages between fish of differing genotypes. Leopard mutants (*cx41.8<sup>tl</sup>*) and albino mutant fish (*slc45a2<sup>b4</sup>*) were stage matched by SL to appropriate wildtype fish. Wildtype fish DP1–5 (**A, D, G, J, M**), leopard pigmented fish (**B, E, H, K, N**), and albino fish (**C, F, I, L, O**) show different development of pigment pattern.
